# Supplementary material
Source: PubMed Central journal article supplement (PMC4387555)
Supplement: cr201524x4.pdf [file cr201524x4.pdf]

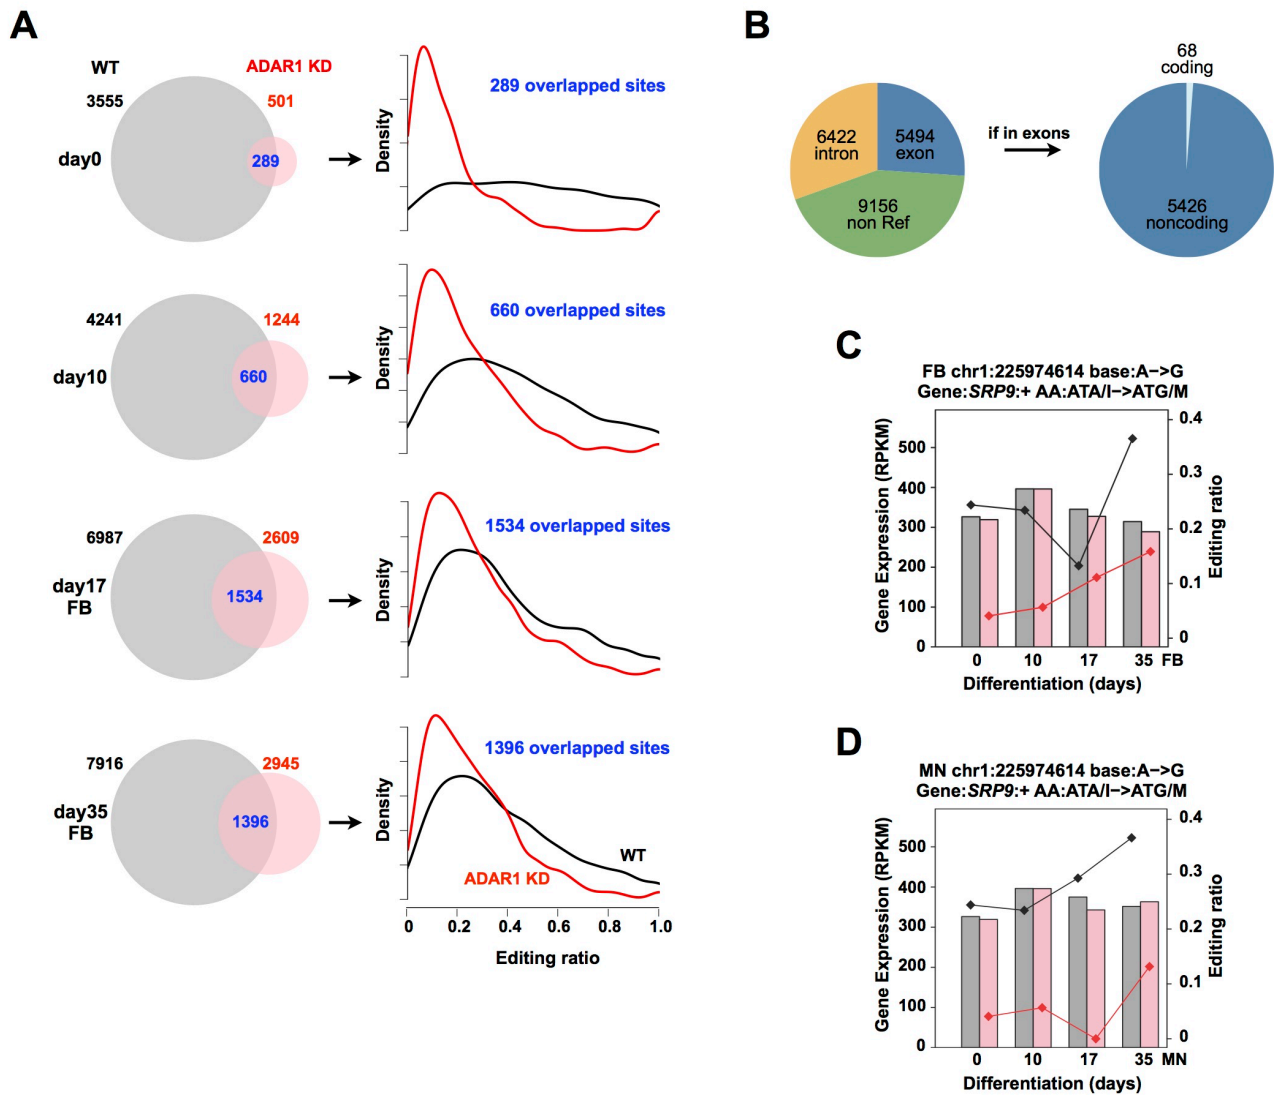

**Supplemental Figure S4. Genome wide analyses of A-to-I editing sites after ADAR1 KD.**

(A) A-to-I editing ratios were significantly repressed after ADAR1 KD. Left, Venn diagrams illustrate the unique and overlapped (numbers in blue) high confidence A-to-I editing sites between WT (in grey) and ADAR1 KD (in pink) at different time points. Right, A-to-I editing ratios at overlapped editing sites of WT (black curve) and ADAR1 KD (red curve) were decreased with ADAR1 KD (red curves shift to left).

(B) The genomic distribution of detected high confidence A-to-I editing sites. Left, about 26% A-to-I editing sites are located in RefSeq exons. Right, 68 A-to-I editing sites are located in coding exons.

(C-D) No significant expression change of *SRP9* was detected, but A-to-I editing at its coding exon was altered upon differentiation to forebrain (C) or motor (D) neuron.

Histograms indicate gene expression (y axis in left), and lines with diamonds indicate A-to-I editing ratios (y axis in right) under WT and ADAR1 KD conditions.
