# Supplementary material
Source: PubMed Central journal article supplement (PMC4387555)
Supplement: cr201524x5.pdf [file cr201524x5.pdf]

**A**

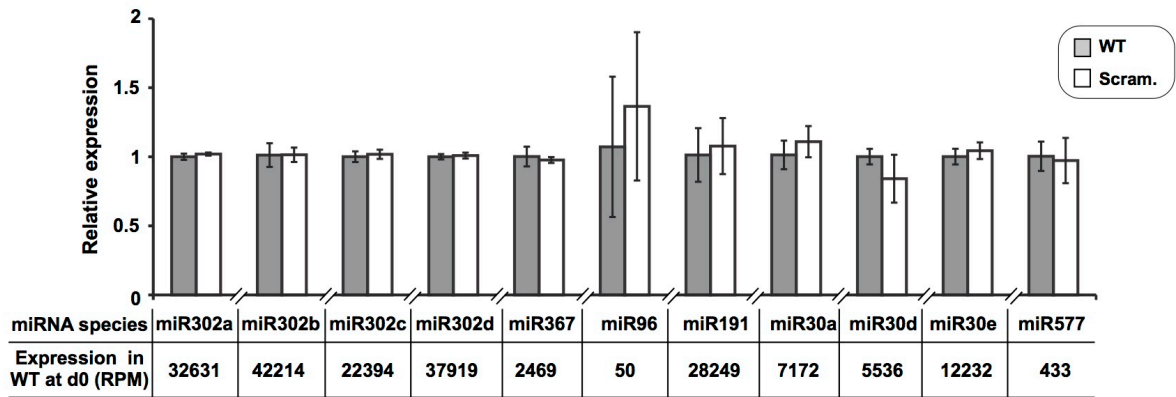

**B**

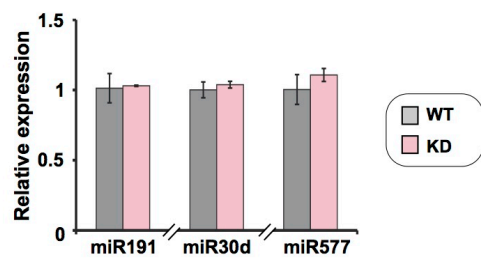

**C**

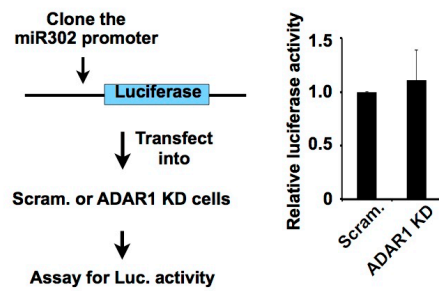

**D**

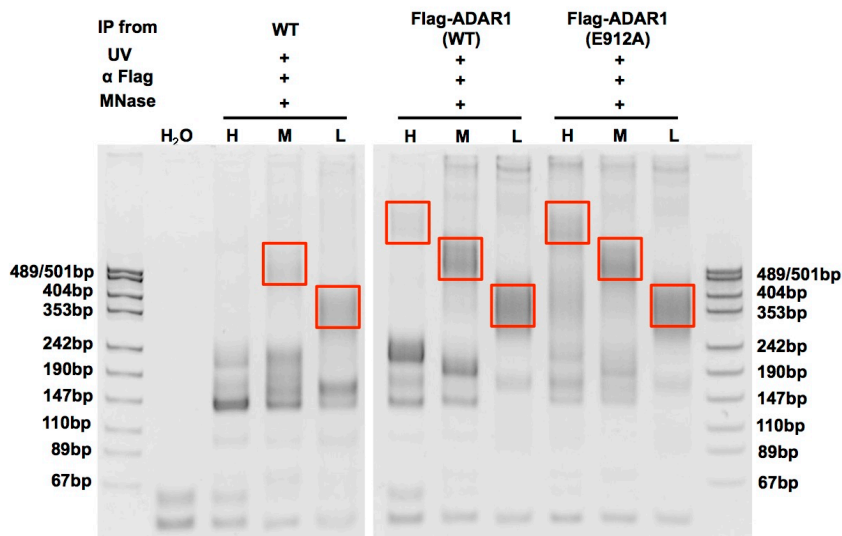

**E**

|                                        | Flag-ADAR1          | Flag-E912A          | hnRNP (König et al., 2010) |
|----------------------------------------|---------------------|---------------------|----------------------------|
| Raw reads                              | 70,924,387          | 53,360,651          | 6,278,981                  |
| Mapped reads                           | 27,142,295 (38.27%) | 21,538,484 (40.36%) | 4,162,812 (66.30%)         |
| Unique reads (removing PCR duplicates) | 875,955 (1.24%)     | 975,025 (1.83%)     | 641,350 (10.21%)           |
| Clusters (FDR < 0.05)                  | 62,093 (0.09%)      | 106,649 (0.20%)     | 33,991 (0.54%)             |

### **Supplemental Figure S5.Characterization of ADAR1 on miRNA processing.**

(A) Scramble shRNA treatment in H9 cells did not alter expression of miRNAs. The expression of up-regulated or unchanged miRNAs by ADAR1 KD was not affected when treated with a scramble shRNA.

(B) Validation of unchanged miRNAs by ADAR1 KD by RT-qPCR.

(C) ADAR1 is unlikely involved in the transcriptional regulation of miR-302. Left, a schematic view of the reporter construct for miR-302 promoter. Right, the luciferase expression of miR-302 reporter construct in Scram. or ADAR1 KD HeLa cells.

(D) Visualization of Flag-ADAR1 or Flag-E912A immunoprecipitated RNAs for iCLIP assay. RNAs were isolated from protein-RNA complexes after anti-Flag IP, reversely transcribed, and then separated on urea-gels. Three banks (high, medium and low) were individually cut for sequencing after library preparation.

(E) Statistic analysis of iCLIP analysis.
