# Supplementary material
Source: PubMed Central journal article supplement (PMC4387555)
Supplement: cr201524x6.pdf [file cr201524x6.pdf]

**A**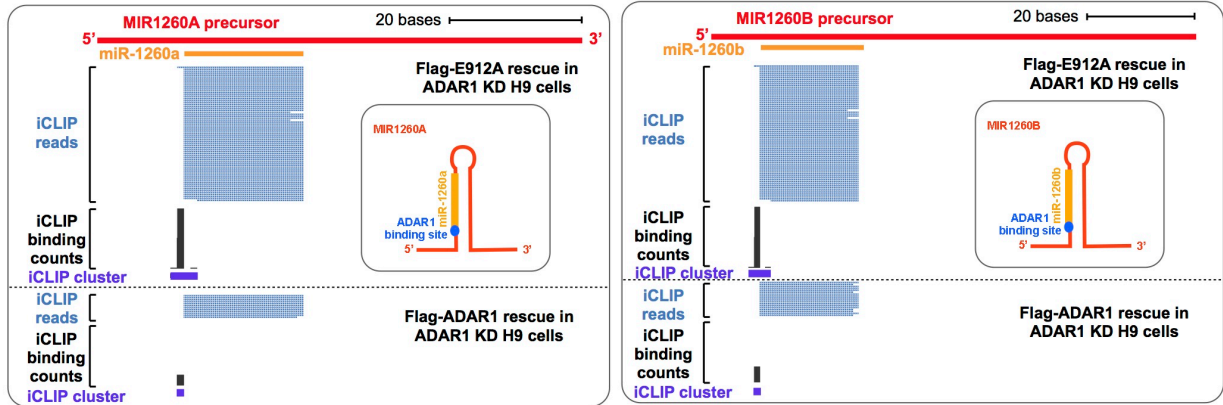**B**

|           | Exp. in WT H9 cells | Exp. in ADAR1 KD H9 cells |
|-----------|---------------------|---------------------------|
| miR-1260a | 537                 | 1351                      |
| miR-1260b | 671                 | 1245                      |

**C**

|            | iCLIP peaks | miRNA regions with peaks | Clusters (FDR < 0.05) | miRNA regions with clusters |
|------------|-------------|--------------------------|-----------------------|-----------------------------|
| Flag-ADAR1 | 3478        | 725                      | 1291                  | 335                         |
| Flag-E912A | 7449        | 848                      | 2105                  | 373                         |

**D**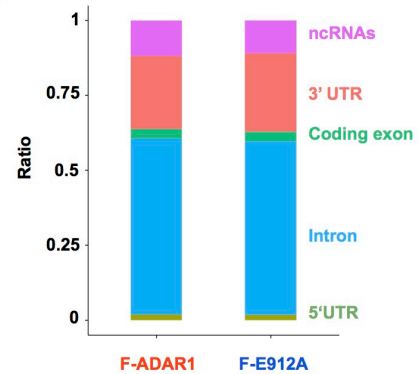

**Supplemental Figure S6. Genome-wide analysis of ADAR1 binding sites from iCLIP-seq datasets in H9 cells.**

(A) Flag-ADAR1 and Flag-ADAR1-E912A iCLIP-seq reads (in blue) or iCLIP binding counts (in black) aligned to pri-miR1260s, with the mature miRNA boundaries depicted below (orange bars). The iCLIP clusters are depicted as purple rectangles.

(B) The normalized expression of miR1260a/b (RPM) in WT and ADAR1 KD H9 cells. Note that no A-to-I editing site could be detected in pri-miR1260s.

(C) Genome-wide analyses of ADAR1 binding sites. About 20% of ADAR1 binding sites were located in pri-miRNA regions.

(D) Genomic distribution of ADAR1 binding sites.
