# Supplementary material
Source: PubMed Central journal article supplement (PMC4387555)
Supplement: cr201524x13.pdf [file cr201524x13.pdf]

## Supplemental Table S7. Primer Sequences.

| <b>A. Primers used in RT-PCR and RT-qPCR analyses</b> |                        |
|-------------------------------------------------------|------------------------|
| OCT4-FOR                                              | TGCAGGCCCGAAAGAGAAAGCG |
| OCT4-REV                                              | GGCTGATCTGCTGCAGTGTGGG |
| ADAR1-FOR                                             | TCTGAACTGTGGCTACTG     |
| ADAR1-REV                                             | TTCCTCACTCTGCTCTTG     |
| REX1-FOR                                              | GGCGGAAATAGAACCTGTCA   |
| REX1-REV                                              | CTTCCAGGATGGGTTGAGAA   |
| NANOG-FOR                                             | CCGTTTTTGGCTCTGTTTTG   |
| NANOG-REV                                             | TCATCGAAACACTCGGTGAA   |
| Pax6-FOR1                                             | GGCAACCTACGCAAGATGGC   |

|             |                          |
|-------------|--------------------------|
| Pax6-REV1   | TGAGGGCTGTGTCTGTTCCGG    |
| Pax6-FOR2   | GCATTTGCATGTTGCGGAGT     |
| Pax6-REV2   | CCTGAACCAGAGCGGGAAAT     |
| HoxB6-FOR   | AACTCCACCTTCCCCGTCAC     |
| HoxB6-REV   | CTTCTGTCTCGCCGAACACG     |
| SOX1-FOR    | GCTGAGCACCCTACGACTTAG    |
| SOX1-REV    | AGCCAAGACCTAGATGCCAACA   |
| HB9-FOR     | AAGGCGGAAACCCACAGT       |
| HB9-REV     | TTTGAACGCTCGTGACATAA     |
| GAPDH-FOR   | GGTATCGTGGAAGGACTCATGAC  |
| GAPDH-REV   | ATGCCAGTGAGCTTCCCGTTCCAG |
| ZEB1-FOR    | GTACCAGAGGATGACCTGCC     |
| ZEB1-REV    | GCCCTTCCTTTCTGTGTCATC    |
| SOX2-FOR    | GGGAAAGTAGTTTGCTGCCTC    |
| SOX2-REV    | AGAGAGGCCAACTGGAATCAGG   |
| TNFAIP6-FOR | GCTGCTGGATGGATGGCTAA     |
| TNFAIP6-REV | CTCCTTTGCGTGTGGGTTGT     |
| LIN28A-FOR  | GAAGGGTTCGGAGCTTGAA      |
| LIN28A-REV  | ACAGTTGTAGCACCTGTCTCC    |
| TGFB2-FOR   | GCGACGAAGAGTACTACGCC     |
| TGFB2-REV   | ATGGCATCAAGGTACCCACAG    |
| CRABP2-FOR  | TTCAAGTGCTGGCTTTGCG      |
| CRABP2-REV  | GGTCGTCAGGTTCTCTGGAT     |
| GABRA3-FOR  | TCGGTCTCTCCAAGTTTGTGC    |
| GABRA3-REV  | TAGGAGACAGCCCGCCAATG     |
| FOXG1-FOR   | CCCGTCAATGACTTCGCAGA     |
| FOXG1-REV   | GTCCCGTCGTAAACTTGGC      |
| GRIA2-FOR   | ATGGCATCGCAACACCTAAA     |
| GRIA2-REV   | CTGGTCTTTTCTTGAATCAC     |
| DLX5-FOR    | CAGCCAAAGCTTATGCCGAC     |
| DLX5-REV    | CGGTCACTTCTTTCTCTGGCT    |
| DLX2-FOR    | GCCAACAACGAGCCTGAGAA     |
| DLX2-REV    | CTCCGGCAAGGCCAAGTATT     |
| DLX6-FOR    | GCGGAGGGAACTCCTACAAC     |
| DLX6-REV    | TTGTTGATCTGTGTCGTCCCC    |
| DLX1-FOR    | TTCCAGTTTGCAGTTGCAGG     |
| DLX1-REV    | ACCAGATCTTGACCTGAGTCT    |
| HOXA4-FOR   | GCTCTGTTTGTCTGAGCGCC     |
| HOXA4-REV   | AATTGGAGGATCGCATCTTGG    |
| HOXA5-FOR   | TCTCGTTGCCCTAATTCATCTTTT |

|                 |                            |
|-----------------|----------------------------|
| HOXA5-REV       | CATTCAGGACAAAGAGATGAACAGAA |
| HOXD3-FOR       | TAATTGTGGTCACCTGGAGCC      |
| HOXD3-REV       | GCCTTCTGCATTGTGCACTC       |
| ATP6V0B-FOR     | GGGCTAGCACTGCTCTACTC       |
| ATP6V0B-REV     | GTCTCCGTCAGGAACCATGC       |
| GSTP1-FOR       | TATTTCCCAGTTCGAGGCCG       |
| GSTP1-REV       | TACAGGGTGAGGTCTCCGTC       |
| PCLO-FOR        | TCCGCATTCAACCAACAAAGC      |
| PCLO-REV        | TGCTGCTTCCTTCACTGTCC       |
| HOXB9-FOR       | CGCCCGAGTACAGTTTGGAA       |
| HOXB9-REV       | CGGAGGGGTTGGTTTGATCC       |
| MDK-FOR         | TCAGACCGGTTCTGGAGACAA      |
| MDK-REV         | TCACCTTATCTTTCTTTTTGGCGAC  |
| NMU-FOR         | ATTCTCAGCCTCAGGCATCC       |
| NMU-REV         | CAACGGATGCACAACACTGACG     |
| S100A6-qF       | GAACAAGGACCAGGAGGTGA       |
| S100A6-qR       | CCCTTGAGGGCTTCATTGTA       |
| SFRP1-qF        | TAGATGCAGGAGGCTCAGGT       |
| SFRP1-qR        | GGTCAGAACGGCCAGTATGT       |
| BAX-qF          | AACATGGAGCTGCAGAGGAT       |
| BAX-qR          | CAGTTGAAGTTGCCGTCAGA       |
| has-miR-200a-3p | TAACACTGTCTGGTAACGATGT     |
| has-miR-96-5p   | TTTGGCACTAGCACATTTTTGCT    |
| hsa-miR-302a-5p | ACTTAAACGTGGATGTA CTTGCT   |
| hsa-miR-302a-3p | TAAGTGCTTCCATGTTTTGGTGA    |
| hsa-miR-302b-3p | TAAGTGCTTCCATGTTTTAGTAG    |
| hsa-miR-302c-3p | TAAGTGCTTCCATGTTTCAGTGG    |
| hsa-miR-302d-3p | TAAGTGCTTCCATGTTTGAGTGT    |
| has-miR-367-3p  | AATTGCACTTTAGCAATGGTGA     |
| miR302a-FOR     | CACCACTTAAACGTGGATGT       |
| miR302a-REV     | CCATCACCAAACATGGAAG        |
| miR302b-FOR     | GCTCCCTTCAACTTTAACATG      |
| miR302b-REV     | ACTCCTACTAAAACATGGAAG      |
| miR302c-FOR     | CCTTTGCTTTAACATGGGGGTA     |
| miR302c-REV     | CCTCCACTGAAACATGGAAG       |
| miR302d-FOR     | CCTCTACTTTAACATGGAGGC      |
| miR302d-REV     | CCACACTCAAACATGGAAGCA      |
| miR367-FOR      | CCATTACTGTTGCTAATATGC      |
| miR367-REV      | CCATCACCATGCTAAAGTGC       |
| miR200a-FOR     | CTGTGAGCATCTTACCGGAC       |

|                   |                           |
|-------------------|---------------------------|
| miR200a-REV       | GCGGGTCACCTTTGAACATC      |
| miR200b-FOR       | CCAGCTCGGGCAGCCGTG        |
| miR200b-REV       | CGTGCAGGGCTCCGCCGTCA      |
| miR200c-FOR       | CCCTCGTCTTACCCAGCAGT      |
| miR200c-REV       | CCTCCATCATTACCCGGCAG      |
| miR96-FOR         | TGGCCGATTTTGGCACTAGC      |
| miR96-REV         | TTTCCCATATTGGCACTGCAC     |
| U6-FOR            | CTCGCTTCGGCAGCACA         |
| U6-REV            | AACGCTTCACGAATTTGCGT      |
| pri-miR302-#1-FOR | GTTCTTGGCTACAGGCCATT      |
| pri-miR302-#1-REV | CCATCACCATTGCTAAAGTGC     |
| pri-miR302-#2-FOR | AAGGGATCCCCTTTGCTTTA      |
| pri-miR302-#2-REV | TGGAGACACCTCCACTGAAA      |
| pri-miR302-#3-FOR | TGCCATTTTGTTTTCTTTCTCCTCA |
| pri-miR302-#3-REV | GGAGCCCACCCAACATACAA      |
| pre-miR-577-F     | GCTGTATTTGGGGGAGTGAA      |
| pre-miR-577-R     | TGAAACCTGGCCTCAGATTC      |
| pre-miR-191-F     | AACGGAATCCCAAAGCAG        |
| pre-miR-191-R     | GAGAGCAGGGGACGAAATC       |
| pre-miR-30a-F     | ATCCTCGACTGGAAGCTGTG      |
| pre-miR-30a-R     | TTGAAGTCCGAGGCAGTAGG      |
| pre-miR-30e-F     | CTTTCTGGGCAGTCTTTGCT      |
| pre-miR-30e-R     | CATCCGACTGAAAGCTCCTC      |
| pre-miR-30d-F     | TAAACATCCCCGACTGGAAG      |
| pre-miR-30d-R     | CGGTAGCAGCAAACATCTGA      |
| mat-miR-577       | TAGATAAAATATTGGTACCTG     |
| mat-miR-191-5P    | CAACGGAATCCCAAAGCAGCTG    |
| mat-miR-30a-5p    | TGTAAACATCCTCGACTGGAAG    |
| mat-miR-30e-5p    | TGTAAACATCCTTGACTGGAAG    |
| mat-miR-30d-5P    | TGTAAACATCCCCGACTGGAAG    |
| mat-miR-302a-5p   | ACTTAAACGTGGATGTAAGGAA    |

|                                         |                       |
|-----------------------------------------|-----------------------|
| <b>B. Primers for editing detection</b> |                       |
| chr14:23441401-23441494-FOR             | TCTGGGGAGGCTAGGTAGGT  |
| chr14:23441401-23441494-REV             | CCTTGAAATACCAAAGCATGA |
| chr2:37328000-37328100-FOR              | CCTCAAGCTCACTGTCACCA  |
| chr2:37328000-37328100-REV              | TGGATGTGGGGATTAAGGAA  |

|                                                      |
|------------------------------------------------------|
| <b>C. Primers used in constructs and mutagenesis</b> |
|------------------------------------------------------|

|                         |                                                                                                                 |
|-------------------------|-----------------------------------------------------------------------------------------------------------------|
| ADAR1-sh2507-FOR        | CGCGTCCCCGCCCAAGTTCGTTTACCAAGCTTCA<br>AGAGAGCTTGGTAAACGAACTTGGGCTTTTTGGA<br>AAT                                 |
| ADAR1-sh2507-REV        | CGATTTCCAAAAAGCCCAAGTTCGTTTACCAAGCT<br>CTCTTGAAGCTTGGTAAACGAACTTGGGCGGGGA                                       |
| ADAR1-sh2794-FOR        | CGCGTCCCCGCTTCAACACTCTGACTAACATTCAA<br>GAGATGTTAGTCAGAGTGTTGAAGCTTTTTGGAAA<br>T                                 |
| ADAR1-sh2794-REV        | CGATTTCCAAAAAGCTTCAACACTCTGACTAACAT<br>CTCTTGAATGTTAGTCAGAGTGTTGAAGCGGGGA<br>CGCGTCCCCGCAGCCATTTATCTCAAATCTTCAA |
| ADAR1-sh3413-FOR        | GAGAGATTTGAGATAAATGGGCTGCTTTTTGGAAA<br>T                                                                        |
| ADAR1-sh3413-REV        | CGATTTCCAAAAAGCAGCCATTTATCTCAAATCT<br>CTCTTGAAGATTTGAGATAAATGGGCTGCGGGGA                                        |
| ADAR1-sh3430-FOR        | CGCGTCCCCGTCTGTACATTGGGTTACCTTCAA<br>GAGAGGTAACCAATGTGACAGATTTTTGGAAAT                                          |
| ADAR1-sh3430-REV        | CGATTTCCAAAAATCTGTACATTGGGTTACCTCT<br>CTTGAAGGTAACCAATGTGACAGACGGGGA                                            |
| ADAR1-sh3464-FOR        | CGCGTCCCCGCATCTGACCCGTGCTATTTGTTCA<br>AGAGACAAATAGCACGGGTCAGATGCTTTTTGGA<br>AAT                                 |
| ADAR1-sh3464-REV        | CGATTTCCAAAAAGCATCTGACCCGTGCTATTTGT<br>CTCTTGAACAAATAGCACGGGTCAGATGCGGGGA                                       |
| ADAR1-sh3743-FOR        | CGCGTCCCCGCTCTGCTCCTTCCGTTACTTCAAG<br>AGAGTAACGGAAGGAGCAGAGCTTTTTGGAAAT                                         |
| ADAR1-sh3743-REV        | CGATTTCCAAAAAGCTCTGCTCCTTCCGTTACTCT<br>CTTGAAGTAACGGAAGGAGCAGAGCGGGGA                                           |
| ADAR1-sh4146-FOR        | CGCGTCCCCGAGGCAGAAACCTAAGAAGTTCAAG<br>AGACTTCTTAGGTTTCTGCCTTTTTGGAAAT                                           |
| ADAR1-sh4146-REV        | CGATTTCCAAAAAGAGGCAGAAACCTAAGAAGTC<br>TCTTGAACTTCTTAGGTTTCTGCCTCGGGGA                                           |
| ADAR1-sh4642-FOR        | CGCGTCCCCGTCTAGAACCAGCCAGACTTTCAAG<br>AGAAGTCTGGCTGGTTCTAGACTTTTTGGAAAT                                         |
| ADAR1-sh4642-REV        | CGATTTCCAAAAAGTCTAGAACCAGCCAGACTTCT<br>CTTGAAGTCTGGCTGGTTCTAGACGGGGGA                                           |
| ADAR1-sh4974-FOR        | CGCGTCCCCGTTGACTAAGTCACATGTAAATTCAA<br>GAGATTTACATGTGACTTAGTCAACTTTTTGGAAAT                                     |
| ADAR1-sh4974-REV        | CAGTTTCCAAAAAGTTGACTAAGTCACATGTAAAT<br>CTCTTGAATTTACATGTGACTTAGTCAACGGGGGA                                      |
| Flag-ADAR1-P110-<br>FOR | CGCGGATCCATGGACTACAAAGACGATGACGACA<br>AGATGGCCGAGATCAAGGAGAAAATCTGC                                             |
| Flag-ADAR1-P110-<br>REV | AAGGAAAAAAGCGGCCGCCTATACTGGGCAGAGA<br>TAAAAGTTCTTTTCTCC                                                         |
| E912A-FOR               | GGAGAACTGTCAATGACTGCCATGCAGCAATAAT<br>CTCCCGGAGAGGCTTCATCAGG                                                    |
| E912A-REV               | CCTGATGAAGCCTCTCCGGGAGATTATTGCTGCAT<br>GGCAGTCATTGACAGTTTCTCC                                                   |
| EAA1-FOR                | GCTGAAGCTGGAAGCGAGGCCGTGGCGGCGCA<br>GGATGCAGCTATGAAAGC                                                          |

|                     |                                                         |
|---------------------|---------------------------------------------------------|
| EAA1-REV            | GCTTTCATAGCTGCATCCTGCGCCGCCACGGCCT<br>CGCTTCCAGCTTCAGC  |
| EAA2-FOR            | CCAGTGTGAGTGCACCCAGCGAGGCAGTGGCAG<br>CGCAGATGGCCGCAGAGG |
| EAA2-REV            | CCTCTGCGGCCATCTGCGCTGCCACTGCCTCGCT<br>GGGTGCACTCACACTGG |
| EAA3-FOR            | CGTCTGCGCACACAGCGAGGCCCAAGGGGCGCA<br>GGAAGCAGCAGATGC    |
| EAA3-REV            | GCATCTGCTGCTTCCTGCGCCCCTTGGGCCTCGC<br>TGTGTGCGCAGACG    |
| miR302-promoter-FOR | CGACGCGTGCATTAATTCCTTAAGTAAACATTTA<br>C                 |
| miR302-promoter-REV | GAAGATCTTAAAAGGCAGGGACTTCAGCCACTTC                      |

| <b>D. Primer used for <i>in vitro</i> processing</b> |                                                                |
|------------------------------------------------------|----------------------------------------------------------------|
| IVT-pre-miR302-F-T7                                  | TGAATTGTAATACGACTCACTATAGGGCCACCACT<br>TAAACGTGGATGTACTTGCTTTG |
| IVT- pre-miR302-R                                    | CCATCACCAAAACATGGAAGCACTTACTTCTTTAG<br>TTTCAAAGCAAGTACATCCACGT |
| IVT-miR302-F-T7                                      | TGAATTGTAATACGACTCACTATAGGGTACAGGTT<br>AAAGGATTCTAAC           |
| IVT- miR302-R                                        | AAAGGAAGACTTACCATCACCAA                                        |
| IVT-miR302-F                                         | TACAGGTAAAGGATTCTAAC                                           |
| IVT- miR302-R-Sp6                                    | CCAAGCTATTTAGGTGACACTATAGAAAAGGAAGA<br>CTTACCATCACCAA          |
|                                                      |                                                                |

## References

- Alon, S., Mor, E., Vigneault, F., Church, G.M., Locatelli, F., Galeano, F., Gallo, A., Shomron, N., and Eisenberg, E. (2012). Systematic identification of edited microRNAs in the human brain. *Genome Res.* 22, 1533-1540.
- Barroso-delJesus, A., Romero-Lopez, C., Lucena-Aguilar, G., Melen, G.J., Sanchez, L., Ligeró, G., Berzal-Herranz, A., and Menendez, P. (2008). Embryonic stem cell-specific miR302-367 cluster: human gene structure and functional characterization of its core promoter. *Mol. Cell. Biol.* 28, 6609-6619.
- Benjamini, Y., Hochberg, Y. (1995). Controlling the false discovery rate: a practical and powerful approach to multiple testing. *J. R. Statist. Soc. B* 57, 289-300.

Boisvert, E.M., Denton, K., Lei, L., and Li, X.J. (2013). The specification of telencephalic glutamatergic neurons from human pluripotent stem cells. *J. Vis. Exp. : JoVE*.

Chen, L.L., and Carmichael, G.G. (2009). Altered nuclear retention of mRNAs containing inverted repeats in human embryonic stem cells: functional role of a nuclear noncoding RNA. *Mol. Cell* 35, 467-478.

Friedlander, M.R., Mackowiak, S.D., Li, N., Chen, W., and Rajewsky, N. (2012). miRDeep2 accurately identifies known and hundreds of novel microRNA genes in seven animal clades. *Nucleic Acids Res.* 40, 37-52.

Han, X., and Amar, S. (2004). Secreted frizzled-related protein 1 (SFRP1) protects fibroblasts from ceramide-induced apoptosis. *J. Biol. Chem.* 279, 2832-2840.

Joesting, M.S., Perrin, S., Elenbass, B., Fawell, S.E., Rubin, J.S., Franco, O.E., Hayward, S.W., Cunha, G.R., and Marker, P.C. (2005). Identification of SFRP1 as a candidate mediator of stromal-to-epithelial signaling in prostate cancer. *Cancer Res.* 65, 10423-10430.

Kim, D., Pertea, G., Trapnell, C., Pimentel, H., Kelley, R., and Salzberg, S.L. (2013). TopHat2: accurate alignment of transcriptomes in the presence of insertions, deletions and gene fusions. *Genome Biol.* 14, R36.

Konig, J., Zarnack, K., Rot, G., Curk, T., Kayikci, M., Zupan, B., Turner, D.J., Luscombe, N.M., and Ule, J. (2010). iCLIP reveals the function of hnRNP particles in splicing at individual nucleotide resolution. *Nat. Struct. Mol. Biol.* 17, 909-915.

Korecka, J.A., van Kesteren, R.E., Blaas, E., Spitzer, S.O., Kamstra, J.H., Smit, A.B., Swaab, D.F., Verhaagen, J., and Bossers, K. (2013). Phenotypic characterization of retinoic acid differentiated SH-SY5Y cells by transcriptional profiling. *PLoS One* 8, e63862.

Kozomara, A., and Griffiths-Jones, S. (2014). miRBase: annotating high confidence microRNAs using deep sequencing data. *Nucleic Acids Res.* 42, D68-73.

Lai, F., Drakas, R., and Nishikura, K. (1995). Mutagenic analysis of double-stranded RNA adenosine deaminase, a candidate enzyme for RNA editing of glutamate-gated ion channel transcripts. *J. Biol. Chem.* *270*, 17098-17105.

Li, H., and Durbin, R. (2009). Fast and accurate short read alignment with Burrows-Wheeler transform. *Bioinformatics* *25*, 1754-1760.

Li, H., Handsaker, B., Wysoker, A., Fennell, T., Ruan, J., Homer, N., Marth, G., Abecasis, G., Durbin, R., and Genome Project Data Processing, S. (2009a). The Sequence Alignment/Map format and SAMtools. *Bioinformatics* *25*, 2078-2079.

Li, X.J., Du, Z.W., Zarnowska, E.D., Pankratz, M., Hansen, L.O., Pearce, R.A., and Zhang, S.C. (2005). Specification of motoneurons from human embryonic stem cells. *Nat. Biotechnol.* *23*, 215-221.

Li, X.J., Zhang, X., Johnson, M.A., Wang, Z.B., Lavaute, T., and Zhang, S.C. (2009b). Coordination of sonic hedgehog and Wnt signaling determines ventral and dorsal telencephalic neuron types from human embryonic stem cells. *Development* *136*, 4055-4063.

Martin, M. (2011). Cutadapt removes adapter sequences from high-throughput sequencing reads. *EMBnet Journal* *17*, 10-12.

Oosterveen, T., Niederreither, K., Dolle, P., Chambon, P., Meijlink, F., and Deschamps, J. (2003). Retinoids regulate the anterior expression boundaries of 5' Hoxb genes in posterior hindbrain. *EMBO J.* *22*, 262-269.

Ota, H., Sakurai, M., Gupta, R., Valente, L., Wulff, B.E., Ariyoshi, K., Iizasa, H., Davuluri, R.V., and Nishikura, K. (2013). ADAR1 forms a complex with Dicer to promote microRNA processing and RNA-induced gene silencing. *Cell* *153*, 575-589.

Pawlowski, J., and Kraft, A.S. (2000). Bax-induced apoptotic cell death. *Proc. Natl. Acad. Sci. USA* *97*, 529-531.



Pinto, Y., Cohen, H.Y., and Levanon, E.Y. (2014). Mammalian conserved ADAR targets comprise only a small fragment of the human editosome. *Genome Biol.* 15, R5.

Quinlan, A.R., and Hall, I.M. (2010). BEDTools: a flexible suite of utilities for comparing genomic features. *Bioinformatics* 26, 841-842.

Toth, A.M., Li, Z.Q., Cattaneo, R., and Samuel, C.E. (2009). RNA-specific Adenosine Deaminase ADAR1 Suppresses Measles Virus-induced Apoptosis and Activation of Protein Kinase PKR. *J. Biol. Chem.* 284, 29350-29356.

Valente, L., and Nishikura, K. (2007). RNA binding-independent dimerization of adenosine deaminases acting on RNA and dominant negative effects of nonfunctional subunits on dimer functions. *J. Biol. Chem.* 282, 16054-16061.

Wang, Z.B., Zhang, X., and Li, X.J. (2013). Recapitulation of spinal motor neuron-specific disease phenotypes in a human cell model of spinal muscular atrophy. *Cell Res.* 23, 378-393.

Xia, K., Xue, H., Dong, D., Zhu, S., Wang, J., Zhang, Q., Hou, L., Chen, H., Tao, R., Huang, Z., *et al.* (2006). Identification of the proliferation/differentiation switch in the cellular network of multicellular organisms. *PLoS Comput Biol.* 2, e145.

Yeo, G.W., Coufal, N.G., Liang, T.Y., Peng, G.E., Fu, X.D., and Gage, F.H. (2009). An RNA code for the FOX2 splicing regulator revealed by mapping RNA-protein interactions in stem cells. *Nat. Struct. Mol. Biol.* 16, 130-137.

Yin, Q.F., Yang, L., Zhang, Y., Xiang, J.F., Wu, Y.W., Carmichael, G.G., and Chen, L.L. (2012). Long Noncoding RNAs with snoRNA Ends. *Mol. Cell* 48, 219-230.

Zhang, X.Q., Huang, C.T., Chen, J., Pankratz, M.T., Xi, J.J., Li, J., Yang, Y., LaVaute, T.M., Li, X.J., Ayala, M., *et al.* (2010). Pax6 Is a Human Neuroectoderm Cell Fate Determinant. *Cell Stem Cell* 7, 90-100.

Zhu, S., Xiang, J.F., Chen, T., Chen, L.L., and Yang, L. (2013). Prediction of constitutive A-to-I editing sites from human transcriptomes in the absence of genomic sequences. *BMC Genomics* 14, 206.
